# Supplementary material for: Metal (hydr)oxide surface precipitates and their effects on potassium sorption
Source: Royal Society of Chemistry journal article supplement (doi:10.1039/d2em00092j), 2022-01-01

## Supplementary Information for

Metal (hydr)oxide surface precipitates and their effects on potassium sorption

### Author names and affiliations

Thanh Quang Pham <sup>a, b</sup>, Aakriti Sharma <sup>a\*\*</sup>, Katherine Coyle <sup>a, c</sup>, Katie Lewis <sup>a</sup>, Matthew G. Siebecker <sup>a\*</sup>

Email: [thanh.pham@ttu.edu](mailto:thanh.pham@ttu.edu), [aakrishasharma@ttu.edu](mailto:aakrishasharma@ttu.edu), [katherine.coyle@ttu.edu](mailto:katherine.coyle@ttu.edu), [katie.lewis@ttu.edu](mailto:katie.lewis@ttu.edu), [matthew.siebecker@ttu.edu](mailto:matthew.siebecker@ttu.edu).

<sup>a</sup> Department of Plant and Soil Science, Texas Tech University, 2911 15th Street, Suite 122, Lubbock, TX 79409, USA.

<sup>b</sup> Department of Chemical Engineering, Texas Tech University, P.O. Box 43121, Lubbock, Texas, 79409, USA.

<sup>c</sup> Department of Geosciences, Texas Tech University, 1200 Memorial Circle, Lubbock, Texas 79409, USA.

### \*Corresponding author

Matthew G. Siebecker, Email: [matthew.siebecker@ttu.edu](mailto:matthew.siebecker@ttu.edu), Phone: +1 (806) 834-0266. FAX: +1 (806) 742-0775

### \*\*Co-corresponding author

Aakriti Sharma, Email: [aakrishasharma@ttu.edu](mailto:aakrishasharma@ttu.edu), Phone: +1 (919) 916-7626

## Table of Contents

- Table S1** – Tabulation of energy values (positions) of different XANES spectral features of analyzed samples. No significant features could be observed in the pre-edge region (3600-3608 eV) of any samples.
- Figure S1** – Transmission Electron Microscopy (TEM) images of non-reacted silicon (S1a) and gamma aluminum oxide (S1b and S1c). S1b is an overview of  $\gamma$ -Al<sub>2</sub>O<sub>3</sub>. Figure S1c indicates the crystalline nature of  $\gamma$ -Al<sub>2</sub>O<sub>3</sub> via the presence of lattice fringes (d-spacing = 4.6 Å). The lattice fringe measurement of 2.3 nm is for 5 lattice fringes.
- Figure S2** – An overview (S2a) and high resolution (S2b) Transmission Electron Microscopy (TEM) images from gamma aluminum oxide reacted with zinc for one month (AlZn1M). The d-spacing value of the lattice fringes in the darker regions was found to be 2.5 and 2.6 Å, which corresponds to that of zaccagnaite. The different d-spacing value that corresponds to  $\gamma$ -Al<sub>2</sub>O<sub>3</sub> are 4.58, 2.8, and 2.39.
- Figure S3** – Transmission Electron Microscopy (TEM) images from the mixed mineral systems  $\gamma$ -Al<sub>2</sub>O<sub>3</sub> and SiO<sub>2</sub> reacted with zinc for one month (SiAlZn1M). Figure S3a is an overview image. Figures S3b and S3c are high resolution.
- Figure S4** – Energy-dispersive X-ray (EDX) spectra obtained from AlZn1M from select regions of  $\gamma$ -Al<sub>2</sub>O<sub>3</sub>, zaccagnaite, empty space, and the Lacey support.
- Figure S5** – Energy-dispersive X-ray (EDX) spectra obtained from AlZn1M from select regions of  $\gamma$ -Al<sub>2</sub>O<sub>3</sub>, SiO<sub>2</sub>, and zaccagnaite-rich regions.

Table S1: Tabulation of energy values (positions) of different XANES spectral features of analyzed samples. No significant features could be observed in the pre-edge region (3600-3608 eV) of any samples.

| Sample ID  | Edge (3608 – 3616 eV) |                   | White line peak position (3614 – 3617 eV) | Post-edge (3617 – 3660 eV) |                        |                  |                   |                |
|------------|-----------------------|-------------------|-------------------------------------------|----------------------------|------------------------|------------------|-------------------|----------------|
|            | 1st shoulder          | 2nd shoulder      | Peak                                      | First valley               | Peak                   | Second valley    | Shoulder          | Peak           |
| 1 SiAlNi1M | subtle (3610.9)       | distinct (3613)   | sharp (3616)                              | -                          | -                      | -                | distinct (3636.4) | broad (3644.6) |
| 2 SiAlZn1M | subtle (3610.9)       | distinct (3613)   | sharp (3616)                              | -                          | -                      | -                | distinct (3636.4) | broad (3644.3) |
| 3 SiAlMg1W | distinct (3610.8)     | subtle (3613.7)   | sharp (3616)                              | -                          | -                      | -                | distinct (3636.4) | broad (3646.5) |
| 4 SiAlMg1M | distinct (3610.8)     | subtle (3613.7)   | sharp (3616)                              | -                          | -                      | -                | subtle (3636.4)   | broad (3645.3) |
| 5 SiAl1W   | distinct (3610.8)     | distinct (3613.6) | round (3616)                              | -                          | -                      | -                | subtle (3636.4)   | broad (3644.9) |
| 6 SiAl1M   | subtle (3610.8)       | distinct (3613.6) | round (3616)                              | -                          | -                      | -                | distinct (3636.4) | broad (3645.4) |
| 7 SiNi1M   | distinct (3610.8)     | subtle (3613)     | sharp (3616)                              | -                          | -                      | -                | distinct (3636.4) | broad (3645.6) |
| 8 SiZn1M   | distinct (3610.8)     | subtle (3614)     | round (3616)                              | -                          | -                      | -                | distinct (3636.4) | broad (3645.1) |
| 9 SiMg1W   | distinct (3610.8)     | subtle (3614)     | round (3616)                              | -                          | -                      | -                | distinct (3636.4) | broad (3645.9) |
| 10 SiMg1M  | distinct (3610.8)     | distinct (3614)   | sharp (3616)                              | -                          | -                      | -                | distinct (3636.4) | broad (3645.4) |
| 11 AlNi1M  | subtle (3610.4)       | subtle (3612.2)   | round (3615.4)                            | shallow (3625.4)           | subtle, broad (3628.4) | shallow (3632.4) | distinct (3636.4) | broad (3643.6) |
| 12 AlZn1M  | subtle (3610.5)       | -                 | sharp (3615.4)                            | deep (3624.5)              | broad (3628.4)         | deep (3632.4)    | subtle (3636.4)   | broad (3643.6) |
| 13 AlMg1W  | subtle (3610.4)       | -                 | round (3616)                              | -                          | subtle, broad (3628.4) | -                | subtle (3636.4)   | broad (3643.4) |
| 14 AlMg1M  | subtle (3610.7)       | -                 | sharp (3615.4)                            | deep (3624.5)              | sharp (3628.4)         | deep (3632.4)    | subtle (3636.4)   | broad (3643.4) |

Figure S1. Transmission Electron Microscopy (TEM) images of non-reacted silicon (S1a) and gamma aluminum oxide (S1b and S1c). S1b is an overview of  $\gamma\text{-Al}_2\text{O}_3$ . Figure S1c indicates the crystalline nature of  $\gamma\text{-Al}_2\text{O}_3$  via the presence of lattice fringes (d-spacing = 4.6 Å). The lattice fringe measurement of 2.3 nm is for 5 lattice fringes.

S1a)  $\text{SiO}_2$  non-reacted

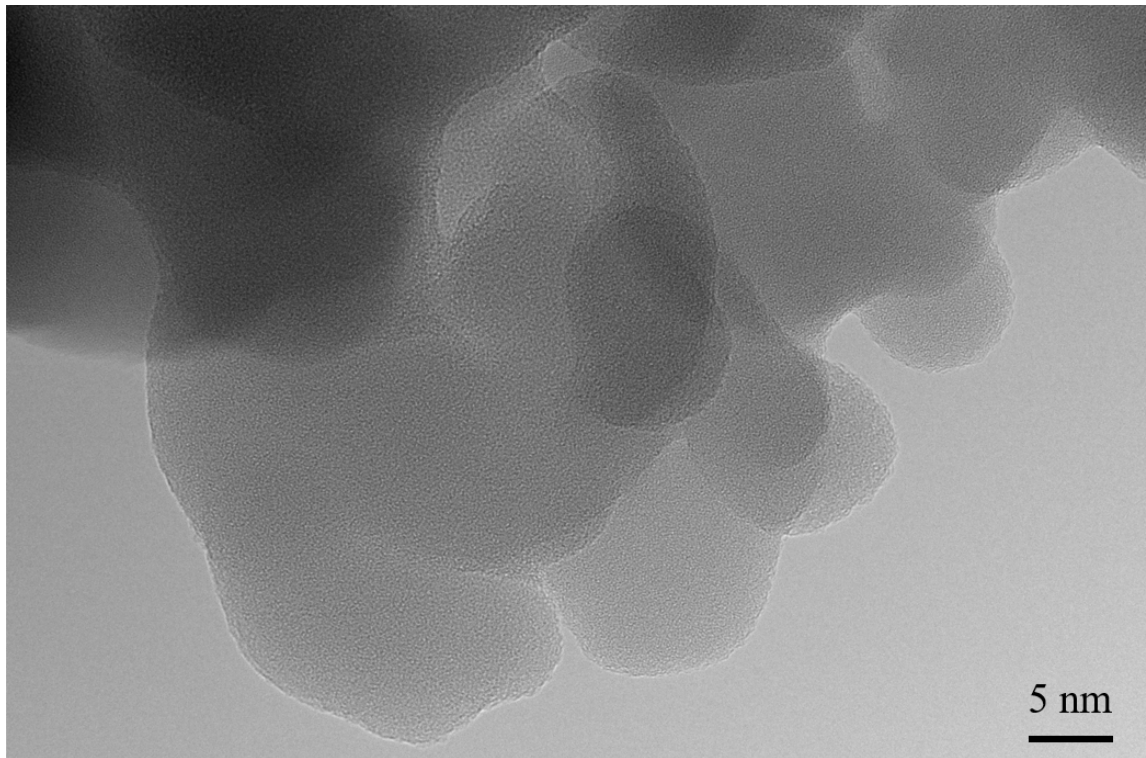

S1b) Al<sub>2</sub>O<sub>3</sub> non-reacted

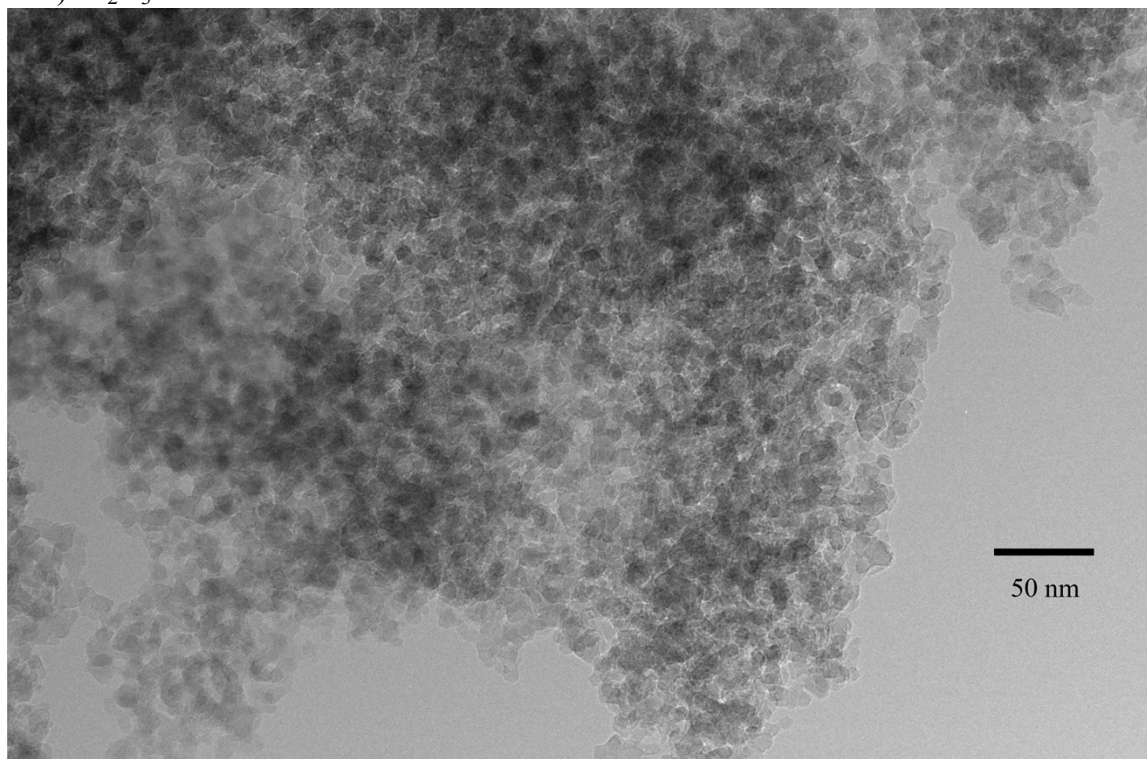

S1c) Al<sub>2</sub>O<sub>3</sub> non-reacted

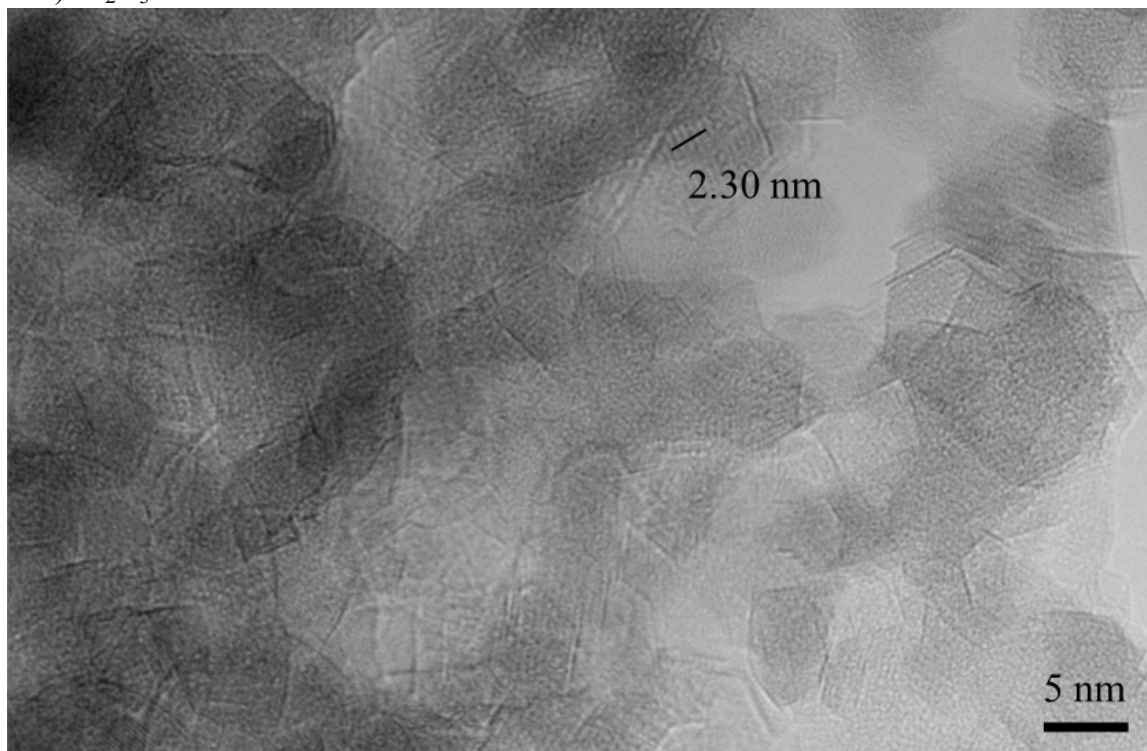

Figure S2. An overview (S2a) and high resolution (S2b) Transmission Electron Microscopy (TEM) images from gamma aluminum oxide reacted with zinc for one month (AlZn1M). The d-spacing value of the lattice fringes in the darker regions was found to be 2.5 and 2.6 Å, which corresponds to that of zaccagnaite. The different d-spacing value that corresponds to  $\gamma$ -Al<sub>2</sub>O<sub>3</sub> are 4.58, 2.8, and 2.39.

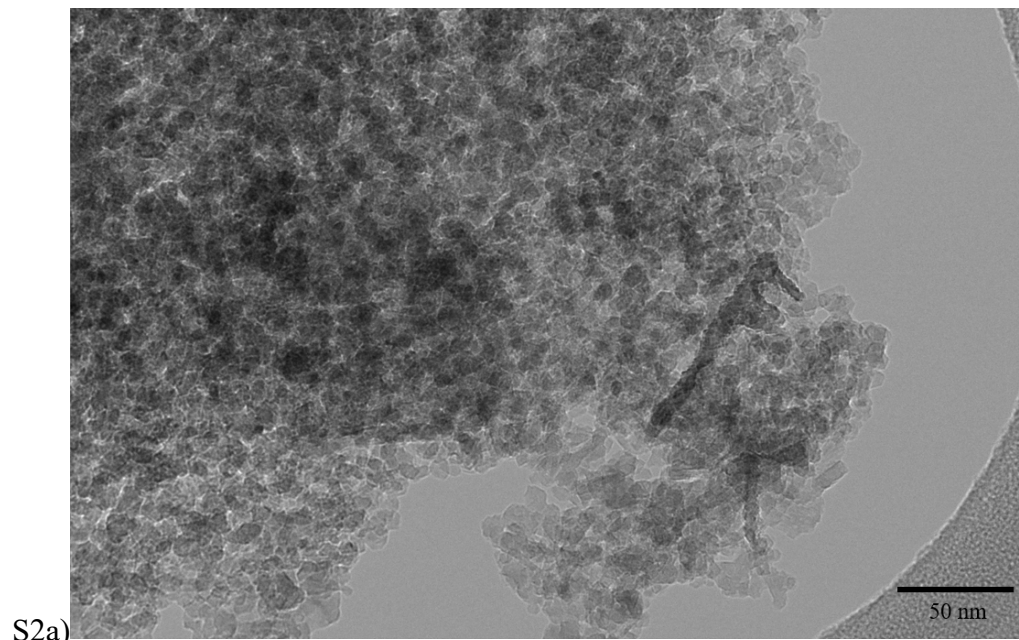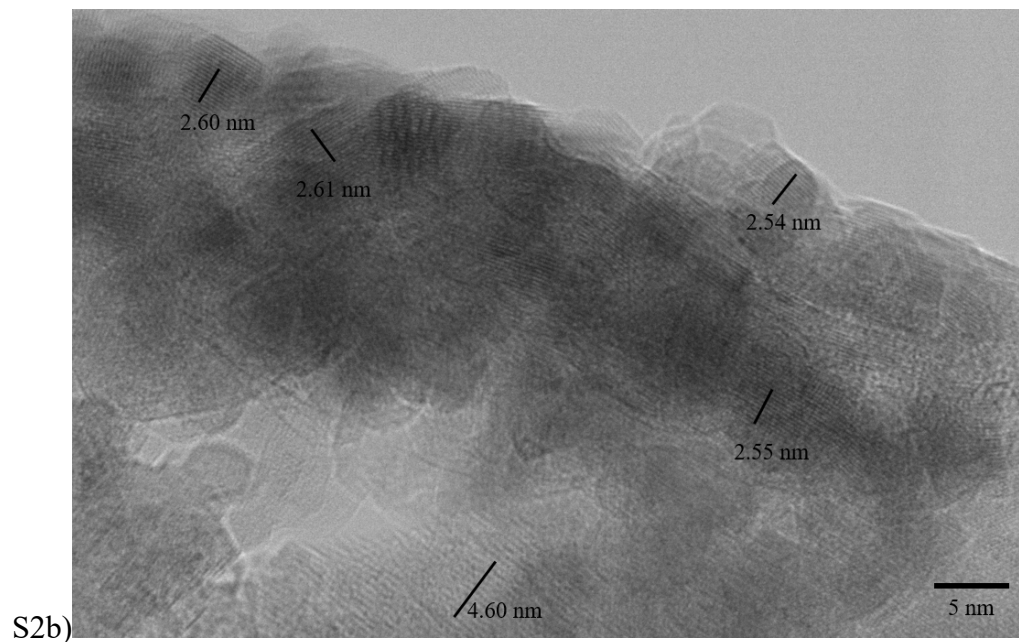

Figure S3: Transmission Electron Microscopy (TEM) images from the mixed mineral systems  $\gamma$ - $\text{Al}_2\text{O}_3$  and  $\text{SiO}_2$  reacted with zinc for one month (SiAlZn1M). (S3a) is an overview image; (S3b) and (S3c) are high resolution images.

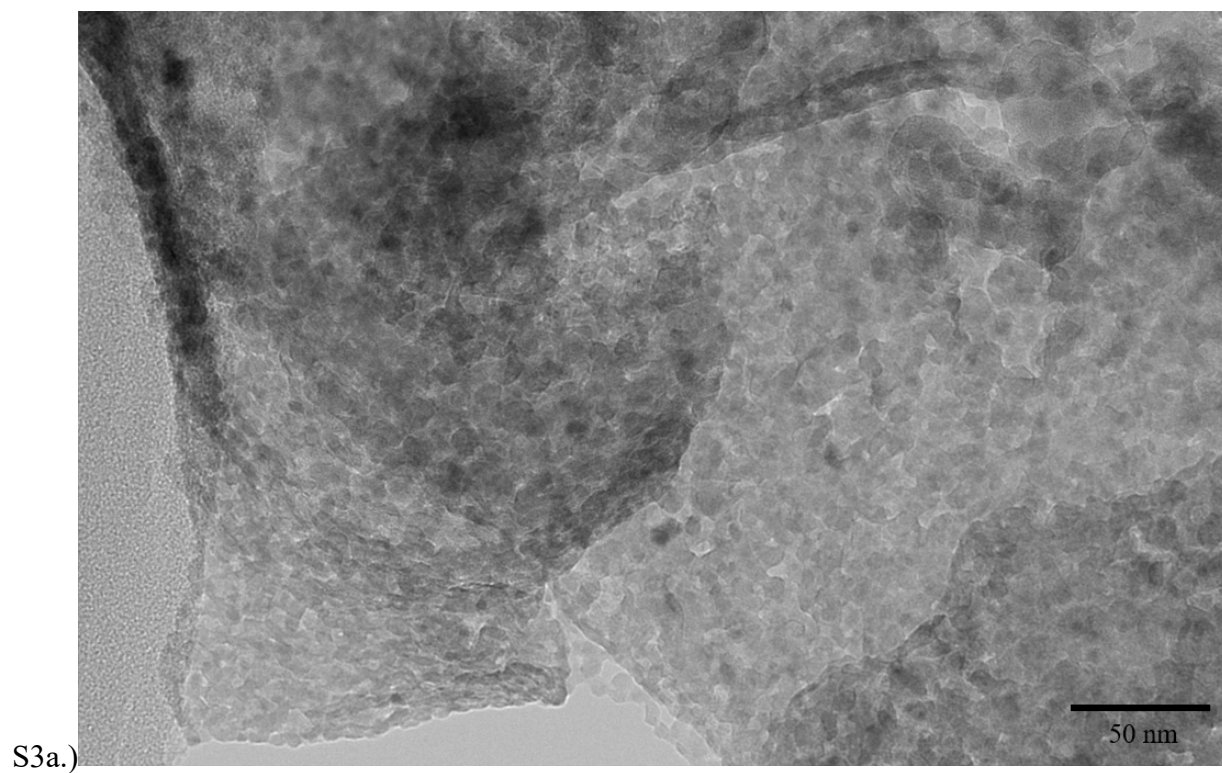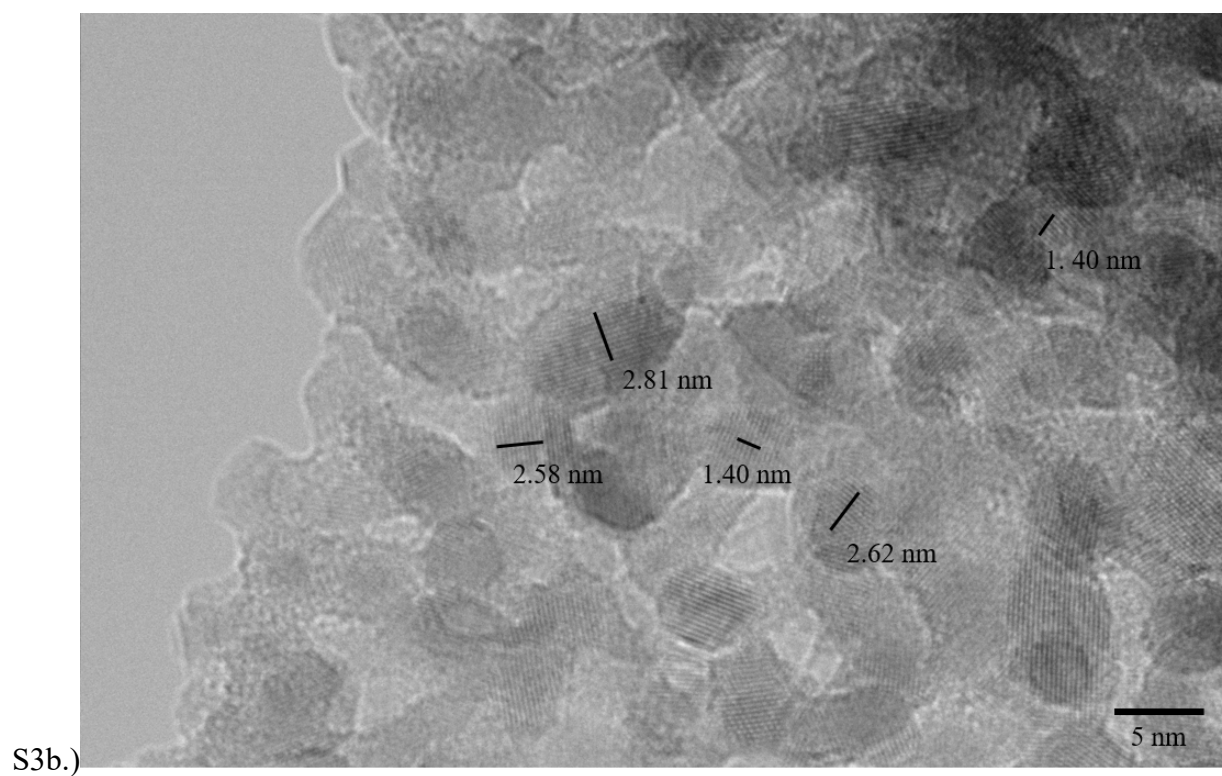

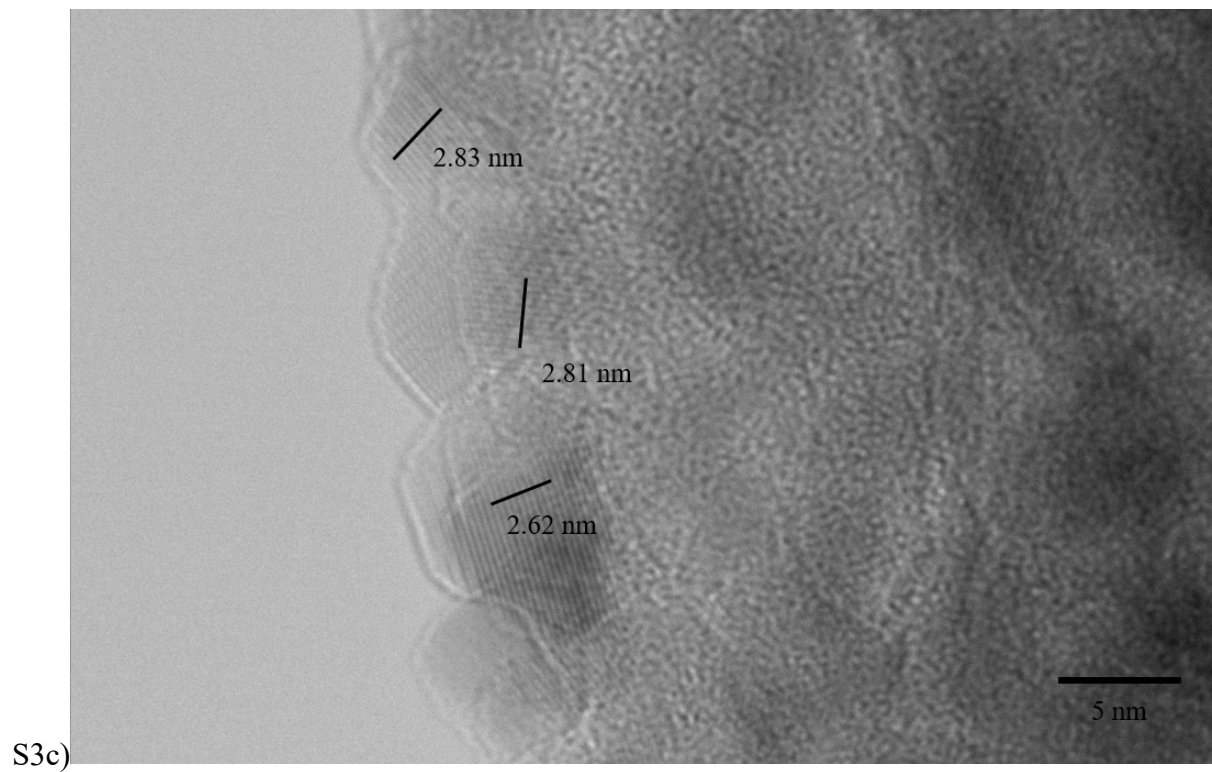



Figure S4. Energy-dispersive X-ray (EDX) spectra obtained from AlZn1M from select regions of  $\gamma$ -Al<sub>2</sub>O<sub>3</sub>, zaccagnaites, empty space, and the Lacey support.

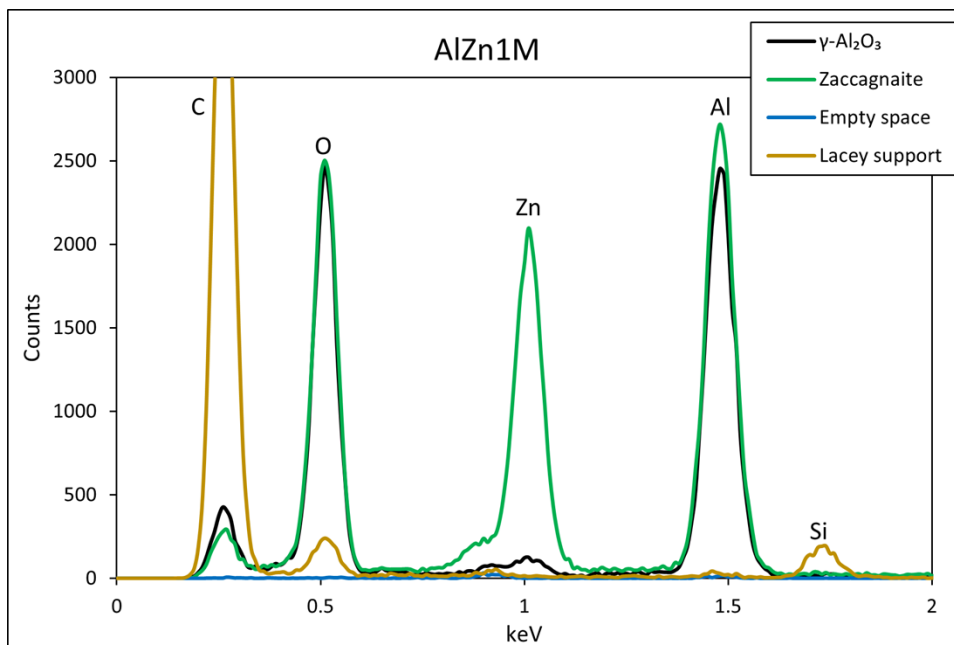

Figure S5. Energy-dispersive X-ray (EDX) spectra obtained from AlSiZn1M from select regions of  $\gamma$ -Al<sub>2</sub>O<sub>3</sub>, SiO<sub>2</sub>, and zaccagnaites-rich regions.

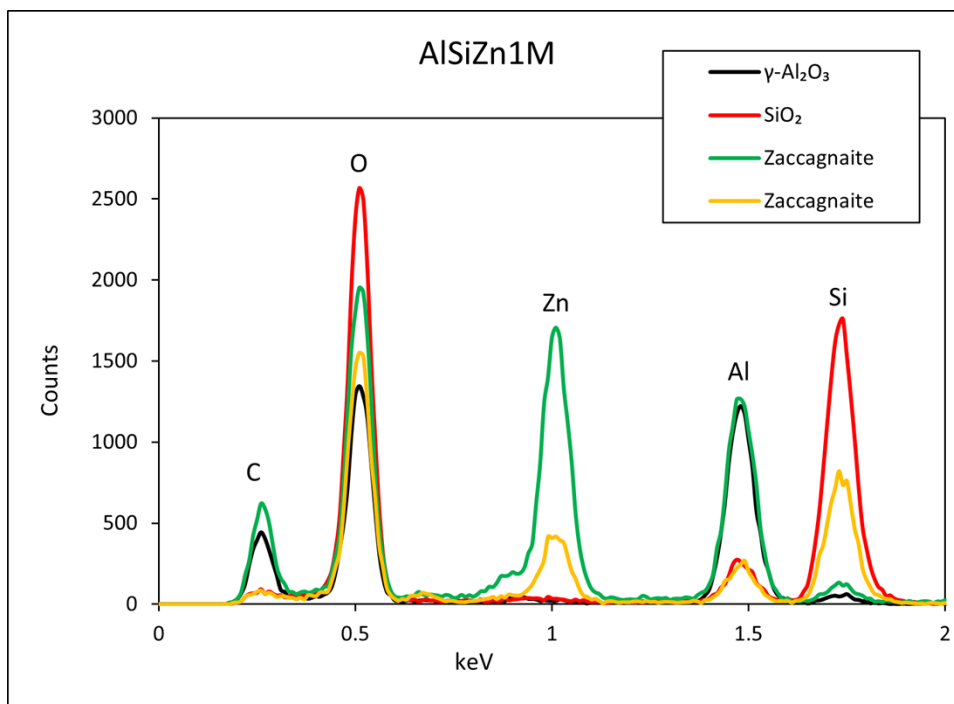

Supplement: d2em00092j1.pdf [file d2em00092j1.pdf]
